1 Giantin knockout models reveal a feedback loop  
2 between Golgi function and glycosyltransferase  
3 expression  
4

5 Nicola L. Stevenson<sup>1</sup>, Dylan J. M. Bergen<sup>1,2</sup>, Roderick E.H. Skinner<sup>2</sup>, Erika Kague<sup>2</sup>, Elizabeth  
6 Martin-Silverstone<sup>2</sup>, Kate A. Robson Brown<sup>3</sup>, Chrissy L. Hammond<sup>2</sup>, and David J. Stephens<sup>1\*</sup>

7  
8 <sup>1</sup> Cell Biology Laboratories, School of Biochemistry, University of Bristol, Biomedical Sciences  
9 Building, University Walk, Bristol, UK, BS8 1TD;

10 <sup>2</sup> School of Physiology, Pharmacology and Neuroscience, University of Bristol, Biomedical Sciences  
11 Building, University Walk, Bristol, UK, BS8 1TD;

12 <sup>3</sup> Computed Tomography Laboratory, School of Arts, University of Bristol, 43 Woodland Road, Bristol  
13 BS8 1UU

14 \* Corresponding author and lead contact: david.stephens@bristol.ac.uk

15 Number of words: 5691

16 **Summary statement:**

17 **Knockout of giantin in a genome-engineered cell line and zebrafish models reveals the capacity of**  
18 **the Golgi to control its own biochemistry through changes in gene expression.**

19 **Abstract**

20 The Golgi is the cellular hub for complex glycosylation, controlling accurate processing of complex  
21 proteoglycans, receptors, ligands, and glycolipids. Its structure and organisation is dependent on  
22 golgins, which tether cisternal membranes and incoming transport vesicles. Here we show that  
23 knockout of the largest golgin, giantin, leads to substantial changes in gene expression despite only  
24 limited effects on Golgi structure. Notably, 22 Golgi-resident glycosyltransferases, but not glycan  
25 processing enzymes or the ER glycosylation machinery, are differentially expressed following giantin  
26 ablation. This includes near-complete loss-of-function of GALNT3 in both mammalian cell and  
27 zebrafish models. Giantin knockout zebrafish exhibit hyperostosis and ectopic calcium deposits,  
28 recapitulating phenotypes of hyperphosphatemic familial tumoral calcinosis, a disease caused by  
29 mutations in GALNT3. These data reveal a new feature of Golgi homeostasis, the ability to regulate  
30 glycosyltransferase expression to generate a functional proteoglycome.

31

32

33 **Keywords**

34 Golgi, giantin, glycosylation, GALNT3, hyperphosphatemic tumoral calcinosis, zebrafish.

35

## 36 Introduction

37 Golgins are coiled-coil domain proteins that project out from the surface of the Golgi apparatus into  
38 the cytosol (Gillingham and Munro, 2016). They maintain Golgi organisation and selectively tether  
39 incoming transport vesicles seeking to fuse with Golgi cisternae. The largest golgin family member is  
40 giantin, whose N-terminal cytosolic domain has a predicted molecular mass of 370kDa (Linstedt and  
41 Hauri, 1993). Giantin is one of only three golgins to have a C-terminal transmembrane domain,  
42 directly anchoring it within cis- and medial-Golgi membranes.

43 The functional role of giantin is poorly defined. Early *in vitro* studies suggest that giantin resides in  
44 COPI vesicles; transport carriers mediating intra-Golgi and retrograde Golgi-to-endoplasmic  
45 reticulum (ER) transport (Sönnichsen et al., 1998). Here, giantin is reported to recruit p115, which  
46 binds simultaneously to GM130 on cis-Golgi membranes to mediate tethering. Giantin-p115  
47 interactions may also facilitate GM130-independent retrograde transport (Alvarez et al., 2001). In  
48 addition to p115, giantin has been shown to interact with GCP60 (Sohda et al., 2001), Rab1, and  
49 Rab6 (Rosing et al., 2007). Rab1 and Rab6 localise to ER-Golgi- and retrograde transport vesicles  
50 respectively and thus their interaction with Golgi-resident giantin could similarly promote vesicle  
51 capture. Furthermore, giantin is also implicated in lateral Golgi tethering (Koreishi et al., 2013) and  
52 ciliogenesis (Asante et al., 2013; Bergen et al., 2017).

53 Rodent models carrying loss-of function alleles of giantin vary in phenotype. Homozygous knockout  
54 (KO) rats, possessing a null mutation in the *Golgb1* gene encoding giantin, develop late embryonic  
55 lethal osteochondrodysplasia (Katayama et al., 2011). Embryonic phenotypes include systemic  
56 oedema, cleft palate, craniofacial defects, and shortened long bones which are largely attributed to  
57 defects in chondrogenesis. Interestingly, chondrocytes from homozygous animals have expanded ER  
58 and Golgi membranes whilst cartilage growth plates contain less extracellular matrix (ECM),  
59 indicative of secretory pathway defects (Katayama et al., 2011). Mouse giantin KO models have less  
60 complex developmental disorders, the most predominant phenotype being cleft palate (Lan et al.,

61 2016) and short stature (McGee et al., 2017). These animals also have ECM abnormalities associated  
62 with glycosylation defects but Golgi structure is normal (Lan et al., 2016). Work from our lab has also  
63 now characterised giantin function in zebrafish (Bergen et al., 2017). In contrast to rodent models,  
64 homozygous giantin KO zebrafish do not show any gross morphological changes during  
65 development, can reach adulthood and show only a minor growth delay. They do however show  
66 defects in cilia length consistent with our previous work *in vitro* (Asante et al., 2013). We have also  
67 defined defects in procollagen secretion following RNAi of giantin expression in cultured cells  
68 (McCaughey et al., 2016). Thus, defects in ECM assembly could underpin some of the developmental  
69 defects seen in giantin knockout model organisms.

70 There are two major pathways of protein glycosylation, *N*- and *O*-glycosylation initiated in the ER  
71 and Golgi respectively. Most oligosaccharides are then subject to modification and extension by  
72 Golgi-resident type II transmembrane glycosyltransferases, the importance of which is underscored  
73 by the clear link between Golgi dysfunction and congenital disorders of glycosylation (Freeze and Ng,  
74 2011). Mucin-type *O*-glycosylation is the most prevalent form of glycosylation on cell surface and  
75 secreted proteins. It is initiated by Golgi-resident polypeptide *N*-acetylgalactosaminyltransferases  
76 (GALNTs) that catalyse the addition of *N*-acetylgalactosamine to serine or threonine residues on  
77 target substrates (forming the Tn antigen, (Bennett et al., 2012)). There are twenty GALNT proteins  
78 in humans with distinct but overlapping substrate specificities and spatio-temporal expression  
79 patterns (Bard and Chia, 2016; Schjoldager et al., 2015). Such redundancy means mutations in  
80 GALNT genes generally produce very mild phenotypes, although several genome-wide association  
81 studies have linked GALNTs with diverse pathologies such as Alzheimer's disease (Beecham et al.,  
82 2014) and obesity (Ng et al., 2012). Moreover, bi-allelic loss-of function mutations in GALNT3 have  
83 been directly linked to the human disease hyperphosphatemic familial tumoral calcinosis (HFTC,  
84 (Ichikawa et al., 2007; Kato et al., 2006; Topaz et al., 2004). In such cases, complete loss of GALNT3  
85 function results in a failure to *O*-glycosylate FGF23, leading to its inactivation and the subsequent  
86 development of hyperostosis and ectopic calcium deposits in skin and subcutaneous tissues.

87 In the absence of a clearly defined role for giantin at the Golgi, we sought to study its function in an  
88 engineered KO cell line. In this system, as well as a zebrafish model, we show for the first time that  
89 loss of giantin results in changes in the expression Golgi-resident glycosyltransferases, defining a  
90 new role for giantin in quality control of Golgi function through transcriptional control.

## 91 **Results**

### 92 *Generation of a giantin KO cell line*

93 We generated a KO cell line for *GOLGB1* (giantin) using genome editing. A GFP-fusion of the double  
94 nickase mutant of Cas9 (Cas9<sup>D10A</sup>-GFP) was co-transfected into human non-transformed telomerase  
95 immortalized retinal pigment epithelial (hTERT-RPE-1) cells with paired guide RNAs targeting exon 7  
96 of the *GOLGB1* gene. GFP-positive cells were then sorted by fluorescence activated cell sorting,  
97 screened for loss of giantin by immunofluorescence, and sequenced at the target site. Using this  
98 approach, one clone was identified with an indel frameshift mutation in both alleles, leading to a  
99 frameshift and premature stop codon in exon 4 (full annotation: R195fsX204-R195P-A196del, Figure  
100 1A). Downstream of the mutation an in-frame translational start site was also noted with the  
101 potential to permit expression of a truncated protein. To exclude this possibility, we probed the  
102 mutant cells for giantin expression using three different antibodies raised against the full length, C-,  
103 and N-termini of the protein. No protein was detected by immunoblot or immunofluorescence using  
104 these antibodies (Figure 1B-D).

### 105 *Loss of giantin does not lead to gross defects in Golgi morphology or trafficking*

106 As giantin resides at the Golgi apparatus, we began characterising the KO cell line by examining Golgi  
107 morphology. KO cells were immuno-labelled for Golgi markers and the size and number of Golgi  
108 elements were quantified. No significant change in Golgi structure was detected (Figure 2A-C). The  
109 relative distribution of *cis*- and *trans*-Golgi markers was also maintained, suggesting organelle  
110 polarity was unperturbed (Figure 2D). Similarly, the general organisation of the early secretory  
111 pathway was normal (Figure 2E, showing labelling for ER exit sites and ER-Golgi intermediate  
112 compartment). We therefore decided to study Golgi morphology in greater detail by electron  
113 microscopy (EM). At this resolution, Golgi stacks had comparable numbers of cisternae in WT and KO  
114 cells and cisternae were of equivalent length with no sign of dilation (Figure 2F-H). Overall these  
115 results suggest Golgi structure was not grossly disrupted following loss of giantin.

116 Many golgins have been shown to act as tethers for transport vesicles but such a function has not  
117 yet been defined for giantin (Wong and Munro, 2014). To test whether giantin is involved in  
118 trafficking, we used the Retention Using Selective Hooks (RUSH) system (Boncompain et al., 2012) to  
119 monitor ER-to-Golgi transport. In this assay a fluorescently-labelled Golgi-resident protein (the  
120 reporter, here EGFP-tagged mannosidase II) is fused to streptavidin binding protein (SBP) and co-  
121 expressed with an ER-resident protein fused to streptavidin (the hook, here tagged with a KDEL  
122 motif). When both engineered fusion proteins are present, the SBP on the reporter binds to the  
123 streptavidin on the hook and is retained in the ER. Reporter release is then induced by the addition  
124 of biotin, which outcompetes the SBP for streptavidin binding. Time-lapse imaging of biotin treated  
125 KO cells expressing this RUSH construct (Supplementary Movies S1 and S2) showed a slight delay and  
126 greater variability in anterograde mannosidase-II trafficking relative to WT, however this difference  
127 was not statistically significant (Figure 2I-J). In order to analyse a greater number of cells, we  
128 repeated this experiment in fixed cells at 0, 10, and 20 minutes post-biotin addition and quantified  
129 cargo delivery at each time point. Again, giantin KO cells showed no significant delay in anterograde  
130 transport compared to WT cells (Figure 2K-L). This approach also allowed us to confirm that we were  
131 observing ER-Golgi transport as we could co-label the Golgi (Figure 2L).

132 Perturbations in anterograde trafficking can result in ER stress and activation of the unfolded protein  
133 response (UPR) as secretory cargo accumulates in this compartment (Brodsky, 2012). We found that  
134 expression of UPR markers including PERK, calnexin and CHOP were unchanged in giantin KO cells  
135 compared to controls (Figure 2M), suggesting no activation of the UPR in giantin KO cells.

### 136 *GM130 localisation is altered in giantin KO cells following Golgi fragmentation*

137 During mitosis, the Golgi must disassemble and reassemble. As we could not detect any gross  
138 defects in Golgi structure in giantin KO cells at steady state, we analysed Golgi dynamics by  
139 chemically inducing its disassembly. First, we treated cells with nocodazole, which disassembles  
140 microtubules and thus causes Golgi ribbons to fragment into polarised mini-stacks (Thyberg and

141 Moskalewski, 1985). Under these conditions, the dynamics of disassembly and reassembly were  
142 found to be equivalent in both cell lines (Figure 3A), with fragmentation of the TGN preceding that of  
143 the *cis*-Golgi as reported previously (Yang and Storrie, 1998). Likewise, Golgi disassembly following  
144 brefeldin A treatment (which inhibits the Arf-guanine nucleotide exchange factor, GBF1) was  
145 comparable in WT and KO cells (Figure S1). We also failed to find any defects in cell cycle progression  
146 using propidium iodide labelling and flow cytometry (data not shown).

147 During these Golgi disruption experiments, we noticed a difference in GM130 labelling of WT and KO  
148 cells. Following nocodazole treatment, giantin reportedly persists on the original fragmenting  
149 membranes (the 'old Golgi') rather than cycling through the ER onto immature peripheral mini-  
150 stacks (Fourriere et al., 2016; Nizak et al., 2003). This is apparent here in WT cells, which show an  
151 enrichment of giantin on larger, juxtannuclear structures over more peripheral elements (Figure 3A).  
152 In KO cells however, these larger Golgi elements are enriched with GM130. This enrichment is not  
153 due to upregulation of GM130 expression, as protein levels are equivalent in WT and KO cells (Figure  
154 3B-C) suggesting instead that GM130 has either redistributed between Golgi membranes, perhaps to  
155 compensate for giantin, or is labelling larger structures not present in WT cells. To distinguish  
156 between these possibilities, we examined cells treated with nocodazole for 90 minutes by EM. As  
157 expected larger, perinuclear 'old Golgi' structures could be detected in both WT and KO cells, as well  
158 as peripheral mini-stacks (Figure 3D). The size distribution of these structures was equivalent in both  
159 cell lines (Figure 3E-F) indicating the larger GM130-labelled elements reflect a redistribution of the  
160 protein.

#### 161 *Giantin negative Golgi 'mini-stacks' show a tendency to circularise*

162 Surprisingly, EM of nocodazole-treated KO cells showed Golgi elements that had apparently  
163 circularised (Figure 3D, insets). These were absent in WT and untreated KO cells, except for one case  
164 of the latter. To quantify curvature of fragmented Golgi elements we calculated the angle between  
165 two lines drawn from each Golgi rim to the centre of the stack; circularised Golgi structures were



166 assigned an angle of 0° and linear stacks 180°. This analysis showed a significant overall trend  
167 towards horseshoe-shaped and circular stacks in the KO cells compared to the WT (Figure 3G).  
168 Giantin-deficient Golgi stacks therefore exhibit structural abnormalities with low frequency (5% of  
169 structures/at least one present in 14% of cells) once fragmented.

#### 170 *Glycosylation enzyme expression patterns are altered in giantin KO cells*

171 Giantin is an evolutionarily conserved gene essential for viability in rodents (Katayama et al., 2011;  
172 Lan et al., 2016), yet phenotypes in our KO cell line and indeed in KO zebrafish (Bergen et al., 2017)  
173 are mild. We therefore considered whether the cells had undergone adaptation, as has been  
174 reported for other KO systems (Rossi et al., 2015). Having established that the expression of other  
175 golgin family members was normal (Figure 3B-C), we performed RNAseq of WT and KO cells to  
176 compare gene expression patterns in an unbiased manner. Pairwise analysis of triplicate samples  
177 identified a total of 1519 genes showing a greater than 2-fold change in expression in KO cells. Of  
178 those, 807 genes exhibited a greater than 3-fold change in expression in KO cells (Supplementary  
179 Table S1). Gene ontology analysis showed that the major classes of genes that were differentially  
180 expressed encoded highly glycosylated proteins, extracellular matrix components, and adhesion  
181 proteins. Twenty-four glycosyltransferases were differentially expressed between the two cell lines.  
182 These include a pseudogene (DPY19L2P2), an ER-resident glycosyltransferase (UGT8) and twenty-  
183 two type II Golgi-resident transmembrane enzymes (Table 1). Some of these were among the most  
184 highly downregulated genes overall. Notably, other ER-localised core glycosyltransferases, glycan  
185 processing and modifying enzymes, and the cytosolic glycosylation machinery were unchanged  
186 following KO of giantin.

187 To determine the impact of altered glycosyltransferase expression in the KO cells, we looked at  
188 global glycosylation patterns using biotinylated lectins to label fixed cells. RCA<sub>120</sub> labelling of β-D-  
189 galactosyl residues was more bundled in KO cells, but otherwise there were no gross changes in  
190 glycan abundance or localisation (Figure S2). We also probed cell lysates with lectins by blotting and

191 found only minor changes in glycosylation patterns, namely loss of a 25 kDa band when labelling  
192 with either ConA or HABP which recognise  $\alpha$ -D-mannosyl and  $\alpha$ -D-glucosyl residues and hyaluronic  
193 acid respectively (Figure S2). Glycosylation patterns are therefore largely normal, but with some  
194 identifiable changes.

#### 195 *GALNT3 expression is substantially reduced in giantin KO cells*

196 To validate the findings of the RNAseq analysis, we first performed an immunoblot for one of the  
197 more highly downregulated glycosyltransferases, GALNT3. This confirmed that protein expression  
198 was almost completely abolished in 5 biological replicates (Figure 4A). Immunolabelling of fixed cells  
199 further demonstrated a near-complete loss of GALNT3 expression in giantin KO cells (Figure 4B).  
200 Additionally, investigation into the most highly upregulated gene overall, RCAN2, similarly  
201 corroborated the RNAseq results at the protein level (Stevenson et al., 2017).

202 *GALNT3* is mutated in the human disease HFTC (Topaz et al., 2004) and so we decided to focus our  
203 studies on this gene. We hypothesised that downregulation of GALNT3 could have occurred in  
204 response to aberrant trafficking following the loss of giantin function; such mistargeting could result  
205 in degradation coupled with a feedback mechanism to downregulate expression. We tested this  
206 directly by expressing FLAG-tagged GALNT3 in WT and KO cells. Immunofluorescence labelling  
207 showed FLAG-GALNT3 is efficiently targeted to the Golgi in both cell lines (Figure 4C). GALNT3  
208 localisation is thus independent of giantin function and not the cause of its down-regulation. We  
209 next decided to test whether GALNT3 down-regulation was reversible by reintroducing epitope-  
210 tagged giantin into KO cells. Giantin KO cells expressing flag-giantin for up to 2 weeks failed to show  
211 any recovery of GALNT3 protein expression (data not shown).

#### 212 *Giantin KO zebrafish phenotypes are consistent with tumoral calcinosis*

213 We next sought to explore the role of giantin in regulating glycosyltransferase expression *in vivo*,  
214 using two recently characterised *golgb1* KO zebrafish lines (Bergen et al., 2017). The first of these,

215 derived by ENU mutagenesis, carries a point mutation (C>T) in exon 14 leading to generation of a  
216 premature stop codon at glutamine-2948 (denoted *golgb1*<sup>Q2948X/Q2948X</sup>). The second allele was  
217 generated by TALEN site-directed mutagenesis, introducing an 8bp insertion at exon 14. This results  
218 in a frameshift at position 3029 leading to a premature stop codon at position 3078 (E3027fsX3078-  
219 T3028\_A3029del, denoted *golgb1*<sup>X3078/X3078</sup>). Both mutations lead to loss of the transmembrane  
220 domain and therefore are expected to be loss-of-function mutations. These fish do not display any  
221 gross developmental defects, but did have a mild developmental delay and an increase in cilia length  
222 (Bergen et al., 2017).

223 Given the skeletal defects seen in human patients lacking GALNT3 function and in giantin KO  
224 rodents, we performed quantitative PCR of mixed bone and cartilage tissues from both mutant fish  
225 lines at 60 days post fertilisation (dpf). In each case, we observed a significant reduction of *galnt3*  
226 expression (Figure 5A) with one KO individual from each line possessing almost undetectable levels  
227 of transcript. Since the giantin KO fish reach adulthood, and given the causative link between loss of  
228 GALNT3 and HFTC in humans, we next examined WT and mutant skeletal structures by micro-  
229 computed tomography (micro CT) in both mutant lines; 3 mutants and siblings of the Q2948X line  
230 were scanned at 8 months post fertilisation and 4 mutants and siblings of the X3078 line were  
231 scanned at 10 months post fertilisation. Both mutant lines showed relatively normal skeletal  
232 patterning consistent with the published phenotype (Figure 5 B-I and (Bergen et al., 2017)).

233 However, both lines exhibited ectopic mineralisation of soft tissues. All 4 mutants from the X3078  
234 line showed ectopic mineralisation of the intervertebral discs, leading to reduction in vertebral  
235 spacing and vertebral fusions (Figure 5 B, C). Furthermore, 2 out of 3 *golgb1*<sup>Q2948X/Q2948X</sup> adults  
236 showed ectopic calcium-like deposits in the soft tissues of the thoracic cavity near bone elements  
237 (Figure 5D G and Supplementary Movies S3 and S4), while the 3<sup>rd</sup> showed deposits within multiple  
238 vertebrae (Figure 5I, and Supplementary Movies S5 and S6). In addition to aberrant mineralisation,  
239 HFTC is also associated with hyperostosis. In addition to the fused vertebrae in both mutant lines we  
240 also observed craniofacial alterations such that the lower jaw was longer and narrower than in their

241 wild type siblings (Figure S3), consistent with altered bone deposition (Figure S3). Total bone mineral  
242 density was not significantly different between the mutants and siblings. However, when readings  
243 were taken across large volumes in the jaw, skull or vertebrae, we observed higher variability in the  
244 mutants than in the wild type fish. This is also consistent with alterations to skeletal homeostasis  
245 (Figure S3).

246

## 247 Discussion

248 The data presented here demonstrate for the first time that the Golgi apparatus has the capacity to  
249 control its own enzymatic composition through changes in transcription. Specifically, we show that  
250 the enzymatic content of the Golgi is altered at the level of transcription in response to loss of  
251 giantin function. The ER and cytosolic glycosylation machineries, as well as Golgi-localised  
252 glycosidases, are unaffected. This process is conserved between mammalian cells and zebrafish  
253 models as GALNT3 mRNA is reduced in both giantin KO systems. Furthermore, we demonstrate this  
254 has functional and physiological relevance as giantin KO zebrafish show ectopic calcificated  
255 structures, similar to phenotypes seen in the human congenital disorder of glycosylation, HFTC.

256 We report that 24 enzymes involved in multiple glycosylation pathways exhibit altered expression  
257 following *GOLGB1* ablation. This implies that this change is not in response to a deficiency in a single  
258 reaction but a global adjustment of Golgi biochemistry. We consider this an adaptive response to  
259 giantin loss-of-function and it suggests a plasticity within the system that could have relevance to  
260 many processes including cell differentiation, tissue morphogenesis and responses to the  
261 extracellular environment. This is supported by the fact that KO cells and zebrafish are both viable  
262 and relatively unaffected by the transcriptional changes seen here. Indeed, lectin binding is largely  
263 equivalent in WT and KO cells suggesting that the new enzymatic equilibrium is broadly effective and  
264 the fidelity of glycosylation is largely maintained.

265 Genetic adaptation is an increasingly reported response to CRISPR-Cas9 generated mutations  
266 (Cerikan et al., 2016; Rossi et al., 2015). Such changes mask the original gene function but arguably  
267 better reflect disease states. Giantin depletion by siRNA has been reported to cause the specific  
268 redistribution of glucosaminyl (N-acetyl) transferase 3 (GCNT3) from the Golgi to the ER (Petrosyan  
269 et al., 2012). Expression of this gene was unaffected in our study but it is possible that perturbed  
270 transport of other enzymes instigated the transcriptional changes seen here. We found that giantin  
271 is not responsible for trafficking of GALNT3 to the Golgi, so transcriptional down-regulation of this

272 enzyme at least is not the result of an anterograde trafficking defect. In addition, we do not detect  
273 any defects in cilia formation or function in giantin KO cells (Stevenson et al., 2017) or KO zebrafish  
274 (Bergen et al., 2017) despite robust phenotypes following acute knockdown (using RNAi (Asante et  
275 al., 2013; Bergen et al., 2017). Our previous work showed that knocking down giantin expression  
276 using RNAi resulted in defects in cilia formation and function (Asante et al., 2013; Bergen et al.,  
277 2017). To our surprise, giantin KO RPE-1 cells show no gross defects in ciliogenesis (Stevenson et al.,  
278 2017). Our RNAseq data and other experiments strongly suggest that RCAN2 compensates for loss of  
279 giantin in cilia length control (Stevenson et al., 2017).

280 Glycosylation is a seemingly robust process, with multiple compensatory mechanisms having been  
281 reported in response to gene loss. For example, loss of MGAT in T cells leads to the redistribution of  
282 sugar donors within Golgi cisternae to permit the synthesis of structurally dissimilar but  
283 bioequivalent glycans (Mkhikian et al., 2016). Interestingly, loss of MGAT expression does not result  
284 in major changes in the expression of other glycosyltransferases (Mkhikian et al., 2016). However,  
285 other work has shown that loss of one *N*-acetylglucosaminyltransferase can lead to compensatory  
286 upregulation of a functionally equivalent isoform (Takamatsu et al., 2010). While these studies  
287 demonstrate the capacity of glycosylation for self-correction with respect to a single reaction, our  
288 data show for the first time the role of a non-enzymatic Golgi protein in global control of  
289 glycosylation.

290 The GALNT family of enzymes comprises extensive overlapping substrate specificities and so is a  
291 prime candidate for compensation (Bennett et al., 2012; Schjoldager et al., 2015). Indeed, five  
292 GALNTs are differentially expressed between WT and KO cells; GALNT1, GALNT3, GALNT12 and  
293 GALNT16 were down-regulated whilst GALNT5 was upregulated. Furthermore, staining with HPA  
294 lectin, which binds to the Tn antigen generated by GALNTs, was equivalent in WT and KO cell lines  
295 suggesting that the efficiency of this reaction was broadly maintained following these changes.  
296 Increased GALNT5 activity may therefore be sufficient to counter the loss of the other four enzymes,

297 or the remaining GALNTs act collectively to ensure efficient *O*-glycosylation. The manifestation of  
298 HFTC-like phenotypes in giantin KO fish however is consistent with the idea that loss of GALNT3  
299 cannot be fully compensated for over time with respect to specific substrates. This contrasts with  
300 other work showing that deletion of either GALNT1 or GALNT2, or ectopic expression of GALNT3,  
301 does not result in substantial changes in expression of the other GALNTs (Schjoldager et al., 2015).  
302 Glycosylation deficiencies for specific proteins have also been reported in prostate cancer cells  
303 where giantin is non-functional (Petrosyan et al., 2014).

304 The observed changes in expression of genes encoding Golgi-resident enzymes following loss of  
305 giantin expression suggests the existence of a Golgi-based quality control pathway for glycosylation.  
306 One interpretation of our data is that giantin itself is actively monitoring glycan synthesis or cargo  
307 transit and adjusting gene expression accordingly. Such organelle-based signalling circuits are not  
308 without precedent; the nutrient sensor mTORC1 can interact with and phosphorylate transcription  
309 factor EB (TFEB) on the surface of lysosomes during starvation to promote its nuclear translocation  
310 (Settembre et al., 2012). Giantin itself lacks enzymatic activity but it could function as a signalling  
311 platform in this context. MAPK, PKD and PKA signalling have all been shown to regulate Golgi activity  
312 (Farhan and Rabouille, 2011) but whether any of these pathways intersect with giantin and  
313 transcription remains to be determined. No obvious trafficking defects were detected in the KO cells  
314 at steady state, consistent with a function independent of vesicle tethering. This agrees with a report  
315 showing that, unlike known tethers, mitochondrial relocation of giantin does not result in vesicle  
316 tethering to the mitochondrial membrane (Wong and Munro, 2014). Nonetheless the possibility  
317 remains that the control of intra-Golgi traffic by giantin acts to ensure the accurate distribution of  
318 enzymes across the stack and this intersects with a signalling loop that directs expression of  
319 glycosyltransferases.

320 The lack of major structural changes in the Golgi apparatus in our KO cells is consistent with mouse  
321 KO models (Lan et al., 2016) and knockdown systems (Asante et al., 2013; Koreishi et al., 2013). It

322 has been reported that the introduction of giantin into *Drosophila* S2 cells promotes clustering of  
323 Golgi stacks into pseudo-ribbons, implying a role in lateral tethering (Koreishi et al., 2013). If this is  
324 the case, then the lack of Golgi fragmentation in our KO models indicates that other golgins might  
325 fulfil this function in vertebrate systems. One notable phenotype that we observed was the presence  
326 of circularised Golgi structures following nocodazole treatment in giantin KO cells. This is counter-  
327 intuitive to a role in lateral tethering since removal of an inter-cisternal tether should reduce, rather  
328 than encourage, interactions between cisternal rims. Considering giantin has a predicted reach of  
329 450 nm into the cytosol it is possible that instead it blocks interaction between similar membranes.  
330 During ribbon assembly, it would then need to be excluded from the rims of the stacks that are  
331 coming together. Alternatively, it may play a structural role in maintaining flat cisternae through  
332 homo- or heterotypic interactions or regulate lipid composition. We only see these circular  
333 structures following disassembly, suggesting larger Golgi ribbon structures may be under other  
334 physical constraints that maintain its linear conformation. If giantin does have a role in maintaining  
335 cisternal structure, changes in protein localisation or lipid packing in its absence could play a role in  
336 controlling glycosyltransferase expression. Relocation of GM130 to larger Golgi elements in  
337 nocodazole-treated giantin KO cells is consistent with its accumulation on the 'old Golgi' and with at  
338 least a partial compensation of function following loss of giantin.

339 Quality control mechanisms, such as may be active here, are well documented in the ER but to our  
340 knowledge only one study has looked at this specifically in the Golgi (Oku et al., 2011). This report  
341 found ten Golgi-relevant genes were upregulated in response to Golgi stress by virtue of a seven  
342 nucleotide *cis*-acting element within their promoters termed the Golgi apparatus stress response  
343 element (GASE) (Oku et al., 2011). We failed to identify these genes in our RNAseq analysis, nor was  
344 there any enrichment for promoters containing the GASE motif in our hits. It is therefore unlikely  
345 this pathway is active in our KO cells, but perhaps similar mechanisms exist to detect changes in the  
346 proteoglycome and adjust transcription accordingly.



347 Considerable variation exists between giantin KO animal models (Katayama et al., 2011; Lan et al.,  
348 2016). All, however, exhibit defects that could be attributed to changes in glycosylation, which in  
349 turn affects ECM deposition (Stanley, 2016; Tran and Ten Hagen, 2013). Changes in this process due  
350 to altered glycosyltransferase expression could thus underlie the broad chondrogenesis and  
351 osteogenesis phenotypes seen in rodent KO animals, whilst the diversity seen with regards to  
352 phenotypes likely reflects model specific modes of adaptation. The latter will be determined by  
353 tissue specific expression patterns, different developmental pathways, or differing compensatory  
354 mechanisms to produce bioequivalent glycans between species. Unlike our zebrafish mutants, HFTC-  
355 like phenotypes have not been reported in rodent giantin KO models. As HFTC is a late onset  
356 disorder, rodent models may not be able to develop HFTC-like characteristics, since these animals  
357 die at birth, whilst adult KO zebrafish are viable.

358 Overall, our work identifies a previously uncharacterised mechanism through which the Golgi can  
359 regulate its own biochemistry to produce a functional proteoglycome. Understanding the ability of  
360 cells to adapt and modulate glycosylation pathways through long term changes in gene expression  
361 has implications for normal development and disease pathogenesis in diverse contexts including  
362 congenital disorders of glycosylation (Jaeken, 2010), the onset and progression of cancer (Pinho and  
363 Reis, 2015), and long term health in terms of tissue regeneration and repair.

364

365 **Author contributions**

366 NLS designed and performed experiments, analysed data and wrote the paper, DJB designed and  
367 performed experiments, analysed data and helped write the paper, RS helped with the zebrafish  
368 experiments, KARB, EK, and EM performed and analysed microCT experiments. CLH helped to design  
369 experiments, interpret data and write the paper. DJS conceived and managed the project,  
370 contributed to data analysis, and helped to write the paper.

371

372 **Acknowledgements**

373 We would like to thank Franck Perez and Gaelle Boncompain for sharing the RUSH system with us,  
374 the Earlham Institute for the RNAseq analysis, Emily Wyatt for her contribution to the project and  
375 Andrew Herman and the UoB flow cytometry facility for help with cell sorting. Thanks to Martin  
376 Lowe for sharing reagents and for helpful discussions. We also thank the MRC and Wolfson  
377 Foundation for establishing the Wolfson Bioimaging Facility, and confocal microscopy was supported  
378 by a BBSRC ALERT 13 capital grant (BB/L014181/1). We would like to thank Tom Davies for his help  
379 with CT scanning. The project was funded by the MRC (MR/K018019/1), Wellcome Trust  
380 (099848/Z/12/Z), and Arthritis Research UK (19476 and 21211).

381

## 382 References

- 383 **Alvarez, C., Garcia-Mata, R., Hauri, H. P. and Sztul, E.** (2001). The p115-interactive proteins  
384 GM130 and giantin participate in endoplasmic reticulum-Golgi traffic. *The Journal of biological*  
385 *chemistry* **276**, 2693-700.
- 386 **Asante, D., Maccarthy-Morrogh, L., Townley, A. K., Weiss, M. A., Katayama, K., Palmer, K.**  
387 **J., Suzuki, H., Westlake, C. J. and Stephens, D. J.** (2013). A role for the Golgi matrix protein giantin in  
388 ciliogenesis through control of the localization of dynein-2. *Journal of Cell Science* **126**, 5189-97.
- 389 **Bard, F. and Chia, J.** (2016). Cracking the Glycome Encoder: Signaling, Trafficking, and  
390 Glycosylation. *Trends Cell Biol* **26**, 379-88.
- 391 **Beecham, G. W., Hamilton, K., Naj, A. C., Martin, E. R., Huentelman, M., Myers, A. J.,**  
392 **Corneveaux, J. J., Hardy, J., Vonsattel, J. P., Younkin, S. G. et al.** (2014). Genome-wide association  
393 meta-analysis of neuropathologic features of Alzheimer's disease and related dementias. *PLoS Genet*  
394 **10**, e1004606.
- 395 **Bennett, E. P., Mandel, U., Clausen, H., Gerken, T. A., Fritz, T. A. and Tabak, L. A.** (2012).  
396 Control of mucin-type O-glycosylation: a classification of the polypeptide GalNAc-transferase gene  
397 family. *Glycobiology* **22**, 736-56.
- 398 **Bergen, D. J. M., Stevenson, N. L., Skinner, R. E. H., Stephens, D. J. and Hammond, C. L.**  
399 (2017). The Golgi matrix protein giantin is required for normal cilia function in zebrafish. *Biology*  
400 *open* **6**, 1180-1189.
- 401 **Boncompain, G., Divoux, S., Gareil, N., de Forges, H., Lescure, A., Latreche, L., Mercanti, V.,**  
402 **Jollivet, F., Raposo, G. and Perez, F.** (2012). Synchronization of secretory protein traffic in  
403 populations of cells. *Nature methods* **9**, 493-8.
- 404 **Brodsky, J. L.** (2012). Cleaning up: ER-associated degradation to the rescue. *Cell* **151**, 1163-7.
- 405 **Cerikan, B., Shaheen, R., Colo, G. P., Glasser, C., Hata, S., Knobloch, K. P., Alkuraya, F. S.,**  
406 **Fassler, R. and Schiebel, E.** (2016). Cell-Intrinsic Adaptation Arising from Chronic Ablation of a Key  
407 Rho GTPase Regulator. *Developmental Cell* **39**, 28-43.
- 408 **Farhan, H. and Rabouille, C.** (2011). Signalling to and from the secretory pathway. *Journal of*  
409 *cell science* **124**, 171-80.
- 410 **Fourriere, L., Divoux, S., Roceri, M., Perez, F. and Boncompain, G.** (2016). Microtubule-  
411 independent secretion requires functional maturation of Golgi elements. *Journal of cell science* **129**,  
412 3238-50.
- 413 **Freeze, H. H. and Ng, B. G.** (2011). Golgi glycosylation and human inherited diseases. *Cold*  
414 *Spring Harbor perspectives in biology* **3**, a005371.
- 415 **Gillingham, A. K. and Munro, S.** (2016). Finding the Golgi: Golgin Coiled-Coil Proteins Show  
416 the Way. *Trends Cell Biol* **26**, 399-408.
- 417 **Ichikawa, S., Guignonis, V., Imel, E. A., Courouble, M., Heissat, S., Henley, J. D., Sorenson, A.**  
418 **H., Petit, B., Lienhardt, A. and Econs, M. J.** (2007). Novel GALNT3 mutations causing hyperostosis-  
419 hyperphosphatemia syndrome result in low intact fibroblast growth factor 23 concentrations. *The*  
420 *Journal of clinical endocrinology and metabolism* **92**, 1943-7.
- 421 **Jaeken, J.** (2010). Congenital disorders of glycosylation. *Annals of the New York Academy of*  
422 *Sciences* **1214**, 190-8.
- 423 **Katayama, K., Sasaki, T., Goto, S., Ogasawara, K., Maru, H., Suzuki, K. and Suzuki, H.** (2011).  
424 Insertional mutation in the Golgb1 gene is associated with osteochondrodysplasia and systemic  
425 edema in the OCD rat. *Bone* **49**, 1027-36.
- 426 **Kato, K., Jeanneau, C., Tarp, M. A., Benet-Pages, A., Lorenz-Depiereux, B., Bennett, E. P.,**  
427 **Mandel, U., Strom, T. M. and Clausen, H.** (2006). Polypeptide GalNAc-transferase T3 and familial  
428 tumoral calcinosis. Secretion of fibroblast growth factor 23 requires O-glycosylation. *The Journal of*  
429 *biological chemistry* **281**, 18370-7.
- 430 **Kimmel, C. B., Ballard, W. W., Kimmel, S. R., Ullmann, B. and Schilling, T. F.** (1995). Stages  
431 of embryonic development of the zebrafish. *Dev Dyn* **203**, 253-310.

- 432 **Koreishi, M., Gniadek, T. J., Yu, S., Masuda, J., Honjo, Y. and Satoh, A.** (2013). The golgin  
433 tether giantin regulates the secretory pathway by controlling stack organization within Golgi  
434 apparatus. *PLoS ONE* **8**, e59821.
- 435 **Lan, Y., Zhang, N., Liu, H., Xu, J. and Jiang, R.** (2016). Golgb1 regulates protein glycosylation  
436 and is crucial for mammalian palate development. *Development* **143**, 2344-55.
- 437 **Linstedt, A. D. and Hauri, H. P.** (1993). Giantin, a novel conserved Golgi membrane protein  
438 containing a cytoplasmic domain of at least 350 kDa. *Molecular Biology of the Cell* **4**, 679-93.
- 439 **McCaughey, J., Miller, V. J., Stevenson, N. L., Brown, A. K., Budnik, A., Heesom, K. J.,**  
440 **Alibhai, D. and Stephens, D. J.** (2016). TFG Promotes Organization of Transitional ER and Efficient  
441 Collagen Secretion. *Cell reports* **15**, 1648-1659.
- 442 **McGee, L. J., Jiang, A. L. and Lan, Y.** (2017). Golga5 is dispensable for mouse embryonic  
443 development and postnatal survival. *Genesis* **55**.
- 444 **Mkhikian, H., Mortales, C. L., Zhou, R. W., Khachikyan, K., Wu, G., Haslam, S. M., Kavarian,**  
445 **P., Dell, A. and Demetriou, M.** (2016). Golgi self-correction generates bioequivalent glycans to  
446 preserve cellular homeostasis. *eLife* **5**, e14814.
- 447 **Ng, M. C., Hester, J. M., Wing, M. R., Li, J., Xu, J., Hicks, P. J., Roh, B. H., Lu, L., Divers, J.,**  
448 **Langefeld, C. D. et al.** (2012). Genome-wide association of BMI in African Americans. *Obesity* **20**,  
449 622-7.
- 450 **Nizak, C., Martin-Lluesma, S., Moutel, S., Roux, A., Kreis, T. E., Goud, B. and Perez, F.**  
451 (2003). Recombinant antibodies against subcellular fractions used to track endogenous Golgi protein  
452 dynamics in vivo. *Traffic* **4**, 739-53.
- 453 **Oku, M., Tanakura, S., Uemura, A., Sohda, M., Misumi, Y., Taniguchi, M., Wakabayashi, S.**  
454 **and Yoshida, H.** (2011). Novel cis-acting element GASE regulates transcriptional induction by the  
455 Golgi stress response. *Cell Structure and Function* **36**, 1-12.
- 456 **Petrosyan, A., Ali, M. F. and Cheng, P. W.** (2012). Glycosyltransferase-specific Golgi-  
457 targeting mechanisms. *The Journal of biological chemistry* **287**, 37621-7.
- 458 **Petrosyan, A., Holzapfel, M. S., Muirhead, D. E. and Cheng, P. W.** (2014). Restoration of  
459 compact Golgi morphology in advanced prostate cancer enhances susceptibility to galectin-1-  
460 induced apoptosis by modifying mucin O-glycan synthesis. *Molecular cancer research : MCR* **12**,  
461 1704-16.
- 462 **Pinho, S. S. and Reis, C. A.** (2015). Glycosylation in cancer: mechanisms and clinical  
463 implications. *Nature Reviews Cancer* **15**, 540-55.
- 464 **Ran, F. A., Hsu, P. D., Lin, C. Y., Gootenberg, J. S., Konermann, S., Trevino, A. E., Scott, D. A.,**  
465 **Inoue, A., Matoba, S., Zhang, Y. et al.** (2013). Double nicking by RNA-guided CRISPR Cas9 for  
466 enhanced genome editing specificity. *Cell* **154**, 1380-9.
- 467 **Rosing, M., Ossendorf, E., Rak, A. and Barnekow, A.** (2007). Giantin interacts with both the  
468 small GTPase Rab6 and Rab1. *Experimental Cell Research* **313**, 2318-25.
- 469 **Rossi, A., Kontarakis, Z., Gerri, C., Nolte, H., Holper, S., Kruger, M. and Stainier, D. Y.**  
470 (2015). Genetic compensation induced by deleterious mutations but not gene knockdowns. *Nature*  
471 **524**, 230-3.
- 472 **Schjoldager, K. T., Joshi, H. J., Kong, Y., Goth, C. K., King, S. L., Wandall, H. H., Bennett, E.**  
473 **P., Vakhrushev, S. Y. and Clausen, H.** (2015). Deconstruction of O-glycosylation--GalNAc-T isoforms  
474 direct distinct subsets of the O-glycoproteome. *EMBO Rep* **16**, 1713-22.
- 475 **Settembre, C., Zoncu, R., Medina, D. L., Vetrini, F., Erdin, S., Erdin, S., Huynh, T., Ferron, M.,**  
476 **Karsenty, G., Vellard, M. C. et al.** (2012). A lysosome-to-nucleus signalling mechanism senses and  
477 regulates the lysosome via mTOR and TFEB. *The EMBO journal* **31**, 1095-108.
- 478 **Sohda, M., Misumi, Y., Yamamoto, A., Yano, A., Nakamura, N. and Ikehara, Y.** (2001).  
479 Identification and characterization of a novel Golgi protein, GCP60, that interacts with the integral  
480 membrane protein giantin. *The Journal of biological chemistry* **276**, 45298-306.
- 481 **Sönnichsen, B., Lowe, M., Levine, T., Jämsä, E., Dirac-Svejstrup, B. and Warren, G.** (1998). A  
482 role for giantin in docking COPI vesicles to Golgi membranes. *Journal of Cell Biology* **140**, 1013-21.

- 483 **Stanley, P.** (2016). What Have We Learned from Glycosyltransferase Knockouts in Mice?  
484 *Journal of Molecular Biology* **428**, 3166-82.
- 485 **Stevenson, N. L., Bergen, D. J. M., Xu, X., Wyatt, E., Henry, F., McCaughey, J. M., Vuolo, L.,**  
486 **Hammond, C. L. and Stephens, D. J.** (2017). Regulator of calcineurin-2 is a ciliary protein with a role  
487 in cilia length control. *bioRxiv*, doi.org/10.1101/188946.
- 488 **Takamatsu, S., Antonopoulos, A., Ohtsubo, K., Ditto, D., Chiba, Y., Le, D. T., Morris, H. R.,**  
489 **Haslam, S. M., Dell, A., Marth, J. D. et al.** (2010). Physiological and glycomic characterization of N-  
490 acetylglucosaminyltransferase-IVa and -IVb double deficient mice. *Glycobiology* **20**, 485-97.
- 491 **Thyberg, J. and Moskalewski, S.** (1985). Microtubules and the organization of the Golgi  
492 complex. *Experimental Cell Research* **159**, 1-16.
- 493 **Topaz, O., Shurman, D. L., Bergman, R., Indelman, M., Ratajczak, P., Mizrahi, M.,**  
494 **Khamaysi, Z., Behar, D., Petronius, D., Friedman, V. et al.** (2004). Mutations in GALNT3, encoding a  
495 protein involved in O-linked glycosylation, cause familial tumoral calcinosis. *Nature genetics* **36**, 579-  
496 81.
- 497 **Tran, D. T. and Ten Hagen, K. G.** (2013). Mucin-type O-glycosylation during development.  
498 *The Journal of biological chemistry* **288**, 6921-9.
- 499 **Westerfield, M.** (2000). The zebrafish book. A guide for the laboratory use of zebrafish  
500 (*Danio rerio*).
- 501 **Wong, M. and Munro, S.** (2014). The specificity of vesicle traffic to the Golgi is encoded in  
502 the golgin coiled-coil proteins. *Science* **346**, 1256898.
- 503 **Yang, W. and Storrie, B.** (1998). Scattered Golgi elements during microtubule disruption are  
504 initially enriched in trans-Golgi proteins. *Molecular Biology of the Cell* **9**, 191-207.
- 505

506 Figure 1: Generation of a giantin KO cell line. A. Genomic sequence for CRISPR-Cas9 target site in WT  
507 and engineered KO RPE-1 cell line. Purple lines and scissors depict gRNA binding and cut sites. Blue  
508 nucleotides show the CRISPR PAM site. Green and red nucleotides are those deleted and inserted in  
509 the KO mutation respectively. Amino acid translation shown underneath; asterisk indicates a  
510 premature stop codon. B. Western blot analysis and C. immunofluorescence staining of giantin using  
511 three different antibodies raised against the C-terminus (C-term), N-terminus (N-term) and full  
512 length (FL) protein. All immunoreactivity is lost in the KO cells. D. WT and KO cell mixed population  
513 stained for giantin and other Golgi markers for direct comparison. Images are maximum projections.  
514 Scale bars 10 $\mu$ m.

515

516 Figure 2: Loss of giantin has no effect on Golgi structure or trafficking. A. Representative images of  
517 WT and KO cells immuno-labelled for two *cis*-Golgi markers. The number of GM130 positive  
518 elements per cell (B) and their area (C) was found to be equivalent in WT and KO cells (n=3; 387 WT  
519 and 320 KO cells quantified; orange bars indicate median and interquartile range; statistics Mann-  
520 Whitney; fragments smaller than 0.5 $\mu\text{m}^2$  excluded). D. Co-labelling of cells with *cis*- (GM130) and  
521 *trans*- (TGN46) Golgi markers shows Golgi polarity is maintained in KO cells. E. Representative  
522 images of WT and KO cells immuno-labelled for early secretory pathway markers as indicated. A-E.  
523 Images shown are maximum projections. Scale bar 10 $\mu\text{m}$ . F. Transmission electron micrographs of  
524 Golgi elements in WT and KO cells. The number of cisternae per stack (G) and length of Golgi  
525 cisternae (H) was quantified from experiments represented in (F) (n=3; total 30 cells per cell line;  
526 orange bars indicate median and interquartile range; statistics Mann-Whitney). I-L. WT and KO cells  
527 expressing Str-Kdel/ManII-SBP-EGFP were treated with biotin and imaged live (I-J) or fixed at 0, 10,  
528 and 20 minutes post-biotin addition and immuno-labelled for GM130 (K-L). I. Single plane images  
529 taken from representative movies at 5-minute intervals. See supplementary movies. Scale bar 10 $\mu\text{m}$ .  
530 Arrows show arrival of reporter at Golgi. J. Quantification of the time at which fluorescence appears  
531 in the Golgi apparatus in movies represented in (I) (n=3; 15 WT cells and 23 KO cells quantified; bars  
532 show median and interquartile range; statistics Mann-Whitney). K. Quantification of the number of  
533 GFP-positive Golgi at each timepoint in fixed cells (n=3; 378 WT and 310 KO cells quantified; mean  
534 and standard deviation shown). L. Representative single plane images of fixed cells at each  
535 timepoint. M. Western blot analyses of ER stress markers in lysates taken from WT and KO cells  
536 following treatment with BFA for the indicated time.

537

538 Figure 3: Giantin loss leads to mild changes in Golgi mini-stack structure. A. Representative  
539 maximum projection images of WT and giantin KO cells incubated with 5µm nocodazole as indicated  
540 and immuno-labelled for *cis*-(GM130) and *trans*-(TGN46) Golgi markers or tubulin. In wash out  
541 panels, cells were incubated with nocodazole for 3 hours then washed and incubated in growth  
542 medium for time indicated. Scale bars 10µm. B. Western blot analysis of golgin expression in WT and  
543 KO cells. C. Quantification of blots represented in (B) (n=3, mean and standard deviation shown). D.  
544 Transmission micrographs of WT and KO cells incubated with 5µm nocodazole for 90 minutes.  
545 Inserts show zoom of region denoted by black squares. E-G. Quantification of experiments  
546 represented in D showing (E) cisternal length, (F) number of cisternae per stack and (G) the angle  
547 between lines drawn from each lateral rim of the stack to the centre (n=3; 27 WT and 21 KO cells  
548 quantified; E and G show median and interquartile range, F mean and standard deviation; statistics  
549 Mann-Whitney).

550



551 Figure 4: GALNT3 expression is lost in giantin KO cells. A. Western blot validating down-regulation of  
552 GALNT3 in KO cells (n=5 biological replicates). B. Maximum projection images of mixed populations  
553 of WT and KO cells immuno-labelled for giantin, GM130 and GALNT3. Arrows highlight giantin KO  
554 cells. C. Representative projections of WT and KO cells expressing FLAG-tagged GALNT3 fixed and  
555 stained as indicated. All scale bars 10 $\mu$ m.

556

557 Figure 5: Giantin KO zebrafish have reduced *galnt3* expression and exhibit HFTC-like phenotypes.

558 A. Real-time qPCR pairwise analysis of *galnt3* expression at 60-63 dpf in two *golgb1* mutant zebrafish

559 lines normalised to *gapdh* mRNA levels as housekeeping gene. Bars show mean expression for each

560 mutant line (n=3 per genotype group) relative to WT siblings (WT expression 1A.U. depicted by

561 dashed line). Each circle represents one individual (P value:  $*=<0.05$ , mean with standard deviation).

562 B. Lateral views of micro CT scans of 10-month WT and *golgb1*<sup>X3078/X3078</sup> homozygous mutants,

563 presented as isosurface renders. Boxed regions show enlarged regions in C. C Enlarged regions of the

564 spine; white arrows demarcate intervertebral discs (IVDs), which in wild type are not mineralised but

565 in the mutant ectopic mineralisation is seen manifesting as vertebral fusions. D. Ventral (with high

566 resolution inset) and E. lateral view micro CT images showing craniofacial and spinal elements of a

567 representative WT sibling (Q2948X line, n=3 females). F-I. Three *golgb1*<sup>Q2948X/Q2948X</sup> female individuals

568 showing ectopic calcium deposits in soft tissues (F. ventral view with high resolution inset and G.

569 lateral view of individual 1, and H. ventral view of individual 2) and in spinal column (I. digital axial z-

570 slices of individual 3). D-I. Red arrows indicate mandible joint and green arrows ectopic deposits.

571 Line Q2948X were imaged at 8 months post fertilisation. (A) Unpaired t-test was used as data were

572 normally distributed. Scale bar 100µm.

573

574 Table 1: Glycosylation enzymes differentially expressed between WT and giantin KO RPE-1 cells.  
575 Values shown are Fragments Per Kilobase of transcript per Million mapped reads (FPKM), the  $\log_2$ -  
576 fold change between these and the uncorrected p- and q-values (q being the false discovery rate,  
577 also known as (FDR)-adjusted p-value). All values were found significant (where p is greater than the  
578 FDR after Benjamini-Hochberg correction for multiple-testing). Pathway annotation and steady-state  
579 localisation was done manually based on gene ontology and published literature. Genes highlighted  
580 in red are downregulated and green are upregulated.

581

582

## 583 **Materials and Methods**

584 All reagents were purchased from Sigma-Aldrich unless stated otherwise.

### 585 *Cell culture*

586 Human telomerase-immortalised retinal pigment epithelial cells (hTERT-RPE-1, ATCC) were grown in  
587 DMEM-F12 supplemented with 10% FCS (Life Technologies, Paisley, UK). Cell lines were not  
588 authenticated after purchase other than confirming absence of mycoplasma contamination.

589 Transfections were performed using Lipofectamine 2000™ according to the manufacturer's  
590 instructions (Invitrogen, Carlsbad, CA). Flag-GALNT3 was obtained from ViGene Biosciences (Cat#  
591 CH897457, Rockville, MD) Str-Kdel/Man-SBP-EGFP was a gift from Franck Perez (Institut Curie, Paris,  
592 (Boncompain et al., 2012)). For drug treatments cells were incubated with 5 µM nocodazole (Santa  
593 Cruz, Heidelberg, Germany) or 5 µM brefeldin A diluted in growth medium at 37°C then washed 3x  
594 with growth medium for recovery.

### 595 *Zebrafish husbandry and mutant alleles*

596 London AB zebrafish were used and maintained according to standard conditions (Westerfield, 2000)  
597 and staged accordingly (Kimmel et al., 1995). Ethical approval was obtained from the University of  
598 Bristol Ethical Review Committee using the Home Office Project License number 30/2863. The  
599 *golgb1*<sup>Q2948X</sup> and *golgb1*<sup>X3078</sup> alleles are described in (Bergen et al., 2017).

### 600 *Genome engineering*

601 RPE-1 cells were transfected as above with 1µg each of paired gRNAs HSL0001186601  
602 (ACCTGAGCACGGCCCAAGG) and HSR0001186603 (GTCGTTGACTTGCTGCAACAGG) (obtained  
603 from Sigma) targeting the *GOLGB1* gene plus 0.1 µg pSpCas9n(BB)-2A-GFP (Addgene plasmid #48140  
604 PX461 (Ran et al., 2013)). After 48 hours GFP-positive cells were sorted into 96 well plates, seeding  
605 one cell per well to generate clones. To identify mutations, genomic DNA was prepared using a  
606 Purelink® genomic DNA mini kit (Invitrogen, Carlsbad, CA) and the region targeted by the gRNAs

607 amplified by PCR (primers: forward 5'-CTGGGTCTGGTTGTTGTTGGT-3' reverse 5'-  
608 GGTGTCATGTTGGTGCTCAG-3'; reaction mix: Taq DNA polymerase with thermopol® buffer, 10 mM  
609 dNTP mix, 10 µM each primer and 2 µl genomic DNA; reagents from NEB (M0267L, N0447L)). PCR  
610 products were cloned into the pGEM® T Easy vector according to the manufacturer's instructions  
611 and sequenced using predesigned primers against the T7 promoter (MWG Eurofins).

### 612 *Antibodies, labelling and microscopy*

613 Antibodies used: mouse monoclonal anti-giantin (full length, Abcam, Cambridge, UK, ab37266),  
614 rabbit polyclonal anti-giantin (N-terminus, Covance, CA, PRB-114C), rabbit polyclonal anti-giantin (C-  
615 term, gift from Martin Lowe), mouse anti-GM130 and mouse GMAP210 (BD Biosciences, Oxford, UK,  
616 BD 610823 & BD 611712), sheep anti-TGN46 (Bio-Rad, Hertfordshire, UK, AHP500), sheep anti-  
617 GRASP65 (gift from Jon Lane), rabbit anti-Sec23a (homemade, polyclonal), mouse anti-ERGIC53  
618 (monoclonal clone G1/93, Alexis Biochemicals, ALX-804-602-C100), rabbit anti-TFG (Novus  
619 Biologicals, Cambridge, UK, IMG5901A), Sec16A (KIAA0310, Bethyl Labs, Montgomery, TX, A300-  
620 648A), ER stress antibody sampler kit (Cell Signalling, Hertfordshire, UK, 9956), mouse anti-tubulin,  
621 rabbit anti-GALNT3 and rabbit polyclonal anti-FLAG (Sigma, Dorset, UK, T5168, HPA007613 & F7425),  
622 CASP (gift from Sean Munro), mouse anti-GAPDH (Abcam, Cambridge, UK, ab9484), and sheep anti-  
623 GALNT3 (R&D systems, Abingdon, UK, AF7174). Lectins used: HPA biotinylated lectin (Fisher  
624 Scientific, Loughborough, UK, L11271), Biotinylated lectin kit I (Vector laboratories, Peterborough  
625 UK, BK-1000). HABP (Merck, Hertfordshire, UK, 385911).

626 For antibody labelling, cells were grown on autoclaved coverslips (Menzel #1.5, Fisher Scientific,  
627 Loughborough, UK), rinsed with PBS and fixed in MeOH for 4 minutes at -20°C. Cells were then  
628 blocked in 3% BSA-PBS for 30 minutes and incubated with primary then secondary antibody for 1  
629 hour each, washing in between. Nuclei were stained with DAPI [4,6-diamidino-2-phenylindole (Life  
630 Technologies, Paisley, UK, D1306)] for 3 minutes and coverslips mounted in Mowiol (MSD,  
631 Hertfordshire, UK) or Prolong Diamond antifade (Thermo Fisher, Paisley, UK). For lectin labelling,

632 cells were washed in PBS and fixed in 3% PFA-PBS for 10 minutes at room temperature (for lectins)  
633 or 10 minutes on ice plus 10 minutes at room temperature (for HABP). Cells were permeabilised in  
634 1% (lectins) or 0.1% (HABP) TX-100 in PBS and blocked as above. Biotinylated lectins were diluted to  
635 4 µg/ml in block and incubated with cells for 40 minutes whilst HAPB was diluted to 5 µg/ml and  
636 incubated overnight at 4°C. Cells were washed with PBS, incubated with giantin antibody for 15  
637 minutes, washed and labelled with streptavidin-A568 and anti-rabbit A488 (Fisher Scientific,  
638 Loughborough, UK, S11226). Cells were DAPI stained and mounted as above.

639 Fixed cells were imaged using an Olympus IX70 microscope with 60x 1.42 NA oil-immersion lens,  
640 Exfo 120 metal halide illumination with excitation, dichroic and emission filters (Semrock, Rochester,  
641 NY), and a Photometrics Coolsnap HQ2 CCD, controlled by Volocity 5.4.1 (Perkin Elmer, Seer Green,  
642 UK). Chromatic shifts in images were registration corrected using TetraSpek fluorescent beads  
643 (Thermo Fisher). Images were acquired as 0.2 µm z-stacks.

644 For RUSH assays, cells were seeded onto 35-mm glass-bottomed dishes (MatTek, Ashland, MA) or  
645 coverslips and transfected 24 hr prior to assay; at T0 cells were treated with 40 µM biotin then  
646 imaged every 15 seconds as a single plane for up to 1 hr or fixed at specific time points and stained  
647 as above. Live widefield microscopy proceeded using an Olympus IX81 microscope with 60x  
648 1.42 numerical aperture oil-immersion lens, Sutter DG4 illumination with excitation filters, and  
649 multi-pass dichroic and multi-pass emission filters (Semrock). Images were collected using an Orca  
650 Flash 2.8 sCMOS controlled using Volocity 5.4.2 (PerkinElmer). Cells were kept at 37°C for the  
651 duration of the imaging.

652 Quantification of Golgi structure from widefield images was performed using ImageJ software.  
653 Maximum projection images (GRASP65 channel) were generated from 0.2 µm z-stacks and  
654 thresholded before applying the “analyse particles” feature excluding objects <0.5 µm<sup>2</sup> or on the  
655 edge of the field of view. Golgi cisternal length and curvature measurements taken from

656 micrographs were again made with ImageJ using the segmented line and angle tools. Cisternae  
657 number and RUSH experiments were quantified manually and blind.

#### 658 *EM*

659 Cells were fixed in 2.5% glutaraldehyde, washed for 5 minutes in 0.1 M cacodylate buffer then post-  
660 fixed in 1% OsO<sub>4</sub>/0.1 M cacodylate buffer for 30 minutes. Cells were washed 3x with water and  
661 stained with 3% uranyl acetate for 20 minutes. After another rinse with water, cells were dehydrated  
662 by sequential 10-minute incubations with 70, 80, 90, 96, 100 and 100% EtOH before embedding in  
663 Epon™ at 70°C for 48 hours. Thin 70 nm serial sections were cut and stained with 3% uranyl acetate  
664 then lead citrate, washing 3x with water after each. Once dried, sections were imaged using a FEI  
665 Tecnai12.

#### 666 *Immunoblotting*

667 Cells were lysed in RIPA buffer (50 mM Tris pH7.5, 300 mM NaCl, 2% Triton-X100, 1% deoxycholate,  
668 0.1% SDS, 1 mM EDTA) and samples separated by SDS-PAGE followed by transfer to nitrocellulose  
669 membranes. Membranes were blocked in 5% milk-TBST or 3% BSA-TBST for antibody and lectin  
670 probes respectively. Primary antibodies/lectins diluted in block were incubated with membrane  
671 overnight and detected using HRP-conjugated secondary antibodies or streptavidin respectively  
672 (Jackson ImmunoResearch, West Grove, PA) and enhanced chemiluminescence (GE Healthcare,  
673 Cardiff, United Kingdom).

#### 674 *Quantitative PCR*

675 Total RNA was isolated from ventral bone and cartilage of juvenile *golgb1*<sup>Q2948X</sup> and *golgb1*<sup>X3078</sup>  
676 genotyped fish (60 and 63 dpf respectively, n=3 per genotype) using RNeasy mini kit (cat# 74104,  
677 Qiagen, Manchester, UK). Subsequently, a reverse transcriptase reaction was performed by using  
678 Superscript IV (cat# 18091050, Thermo Fisher). Zebrafish *galnt3* (XM\_009300463.2) coding sequence  
679 was confirmed by multi-species nucleotide BLAST (NCBI) leading to *galnt3* forward 5'-

680 TCCTTCAGAGTGTGGCAGTG and reverse 5'-TGATGGTGTGGCCTTTA primers. *gapdh* as a reference  
681 gene was used (forward 5'-TGTTCCAGTACGACTCCACC and reverse 3'-GCCATACCAGTAAGCTTGCC).  
682 Quantitative Real-Time PCR (qPCR) reactions (quadruplicates per individual) using DyNAmo HS SYBR  
683 green (F410L, Thermo Fisher) with PCR cycles (40 times) of 95°C 25 seconds, 57.5°C 30 second, and  
684 70°C 45 seconds followed by a standard melt curve were applied (QuantStudio3, Applied  
685 Biosystems).

#### 686 *RNAseq*

687 Triplicate samples of mRNA from giantin knockout cells and WT RPE-1 were analysed by RNAseq by  
688 the Earlham Institute (formerly The Genome Analysis Centre). The libraries were constructed by The  
689 Earlham Institute on a PerkinElmer Sciclone using the TruSeq RNA protocol v2 (Illumina 15026495  
690 Rev.F). The library preparation involved the initial QC of the RNA using a Tecan plate reader with the  
691 Quant-iT™ RNA Assay Kit (Life technologies/Invitrogen Q-33140) and the Quant-iT™ DNA Assay Kit,  
692 high sensitivity (Life technologies/Invitrogen Q-33120). Finally, the quality of the RNA was  
693 established using the PerkinElmer GX with a high sensitivity chip and High Sensitivity DNA reagents  
694 (PerkinElmer 5067-4626). RNA quality scores were 8.7 and 9.8 for two of the samples and 10.0 (for  
695 the remaining 4 samples). 1 ug of RNA was purified to extract mRNA with a poly- A pull down using  
696 biotin beads, fragmented and the first strand cDNA was synthesised. This process reverse transcribes  
697 the cleaved RNA fragments primed with random hexamers into first strand cDNA using reverse  
698 transcriptase and random primers. The ends of the samples were repaired using the 3' to 5'  
699 exonuclease activity to remove the 3' overhangs and the polymerase activity to fill in the 5'  
700 overhangs creating blunt ends. A single 'A' nucleotide was added to the 3' ends of the blunt  
701 fragments to prevent them from ligating to one another during the adapter ligation reaction. A  
702 corresponding single 'T' nucleotide on the 3' end of the adapter provided a complementary  
703 overhang for ligating the adapter to the fragment. This strategy ensured a low rate of chimera  
704 formation. The ligation of a number indexing adapters to the ends of the DNA fragments prepared



705 them for hybridisation onto a flow cell. The ligated products were subjected to a bead based size  
706 selection using Beckman Coulter XP beads (Beckman Coulter A63880) to remove un-ligated  
707 adapters, as well as any adapters that may have ligated to one another. Prior to hybridisation to the  
708 flow cell the samples were amplified by PCR to selectively enrich those DNA fragments that have  
709 adapter molecules on both ends and to amplify the amount of DNA in the library. The PCR was  
710 performed with a PCR primer cocktail that annealed to the ends of the adapter. The insert size of the  
711 libraries was verified by running an aliquot of the DNA library on a PerkinElmer GX using the High  
712 Sensitivity DNA chip and reagents (PerkinElmer CLS760672) and the concentration was determined  
713 by using the Tecan plate reader. The resulting libraries were then equimolar pooled and Q-PCR was  
714 performed on the pool prior to clustering.

715 These six total RNA samples were sequenced over two lanes and aligned against the human genome  
716 reference build 38 followed by differential expression analysis between the wildtype and knockout  
717 samples. QC was done using FastQC (version 0.11.2). An in-house contamination-screening pipeline  
718 (Kontaminant) was used to check for any obvious contamination in the raw reads. Since the data  
719 quality was good, there was no trimming done on the raw reads. Alignment of RNAseq reads to the  
720 human genome reference was done using TopHat (version 2.1.0) with “min-anchor-length” 12 and  
721 “max-multi hits” 20. The  $\log_2$  of the fold-change was used in further analysis.

#### 722 *Micro-Computed Tomography Scanning ( $\mu$ CT)*

723 Female fish (n=3) carrying *golgb1*<sup>WT/WT</sup> and mutant *golgb1*<sup>Q2948X/Q2948X</sup> alleles were preserved in  
724 absolute ethanol at 8 mpf. Prior to scanning, the samples were packed in a polystyrene tube and  
725 scanned with a Bruker SkyScan 1272 (Kontich, Belgium) at a 21.8 or 4  $\mu$ m resolution. The X-ray  
726 current was set at 200  $\mu$ A with a voltage of 50 kV.

727 Eight zebrafish (four wild-type and four mutant *golgb1*<sup>X3078/X3078</sup> fish) were scanned together using  
728 a Nikon X-TEK 225 HT computed tomography (CT) scanner at a resolution of 21  $\mu$ m. Fish were  
729 arranged in a circle with seven on the outside surrounding the eighth fish. The first specimen was

730 labelled so it was identifiable in the CT scans using a radiopaque sticker, and the remaining fish were  
731 numbered clockwise.

732 3D tomography images and movies for the *golgb1*<sup>Q2948X</sup> allele were generated using CTvox software  
733 (v.3.0.0). For the *golgb1*<sup>X3078</sup> allele and siblings the fish were segmented using Avizo (v. 9.3,  
734 Visualization Sciences Group), by thresholding greyscale values and labelling specific regions, bones  
735 and individual fish in materials for 3D visualisation. BMD was calculated relative to phantoms of  
736 known hydroxyl appetite density 0.25 and 0.75g/cm<sup>3</sup> in 3 regions: for the skull, the lower jaw and  
737 vertebrae from multiple slices: 25 anteroposterior slices for the sagittal, the anterior-most 15  
738 anteroposterior slices for the lower jaw, and the posterior half of the last vertebra before the end of  
739 the ribs. Using the Material Statistics module of Avizo, the mean greyscale value was calculated for  
740 each of these regions for each fish. BMD in each region was then calculated by multiplying the  
741 greyscale mean value by the maximum of 2.5 arbitrary units divided by the actual greyscale  
742 maximum of 65535. Finally, measurements of maximum lower jaw width and length were measured  
743 using the 3D CT reconstruction for both alleles.

#### 744 *Quantification and statistical analysis*

745 Statistical analyses were performed using GraphPad Prism 7.00. The tests used, n numbers and  
746 sample sizes are indicated in the figure legends, p-values are shown on the figures. All tests met  
747 standard assumptions and the variation between each group is shown. Sample sizes were chosen  
748 based on previous, similar experimental outcomes and based on standard assumptions. No samples  
749 were excluded. Randomisation and blinding were not used except where the genotype of zebrafish  
750 was determined after experimentation.

#### 751 *Data availability*

752 Raw RNAseq data are available in the ArrayExpress database ([www.ebi.ac.uk/arrayexpress](http://www.ebi.ac.uk/arrayexpress)) under  
753 accession number E-MTAB-5618.

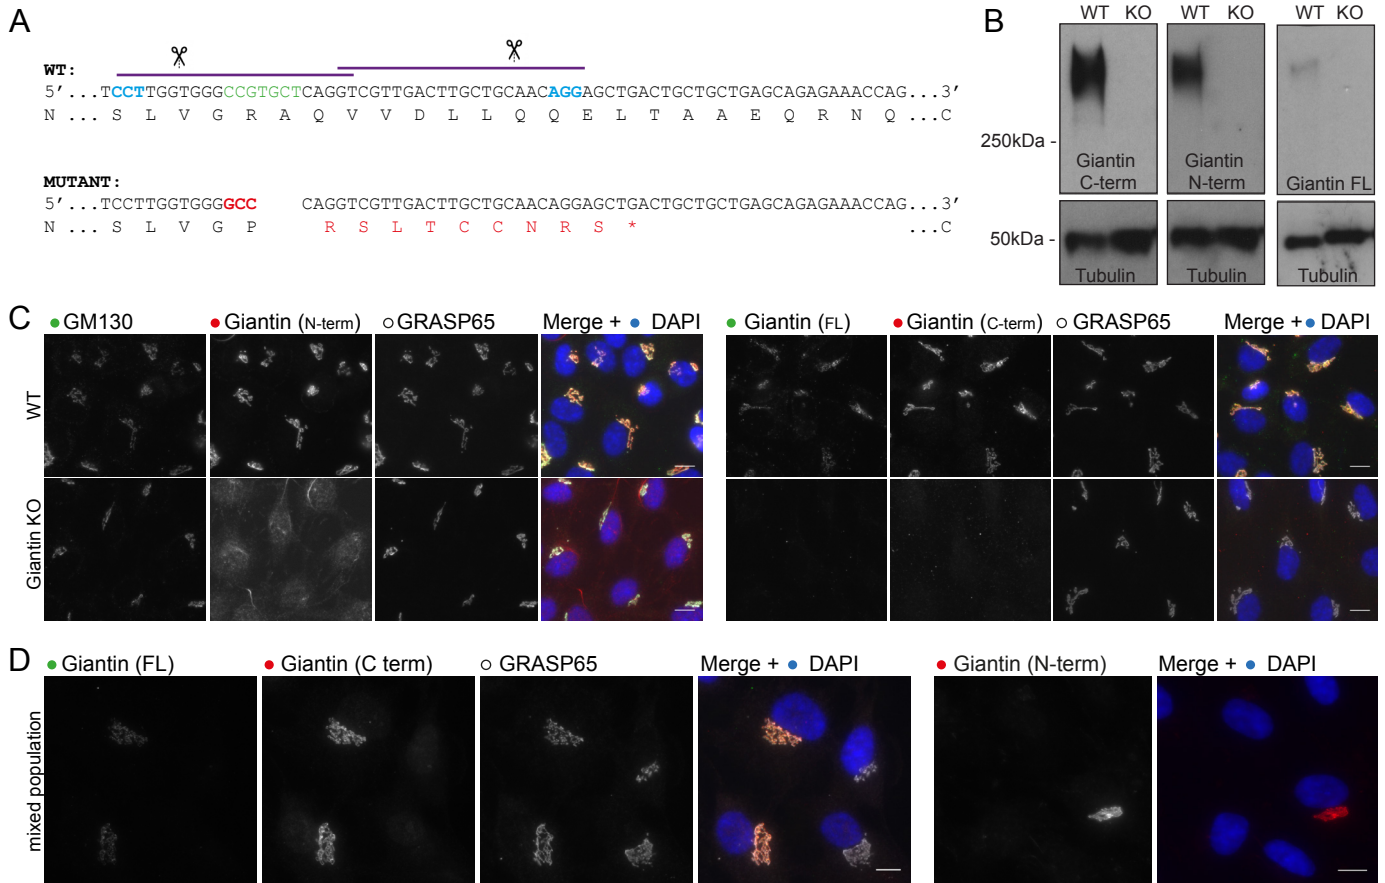

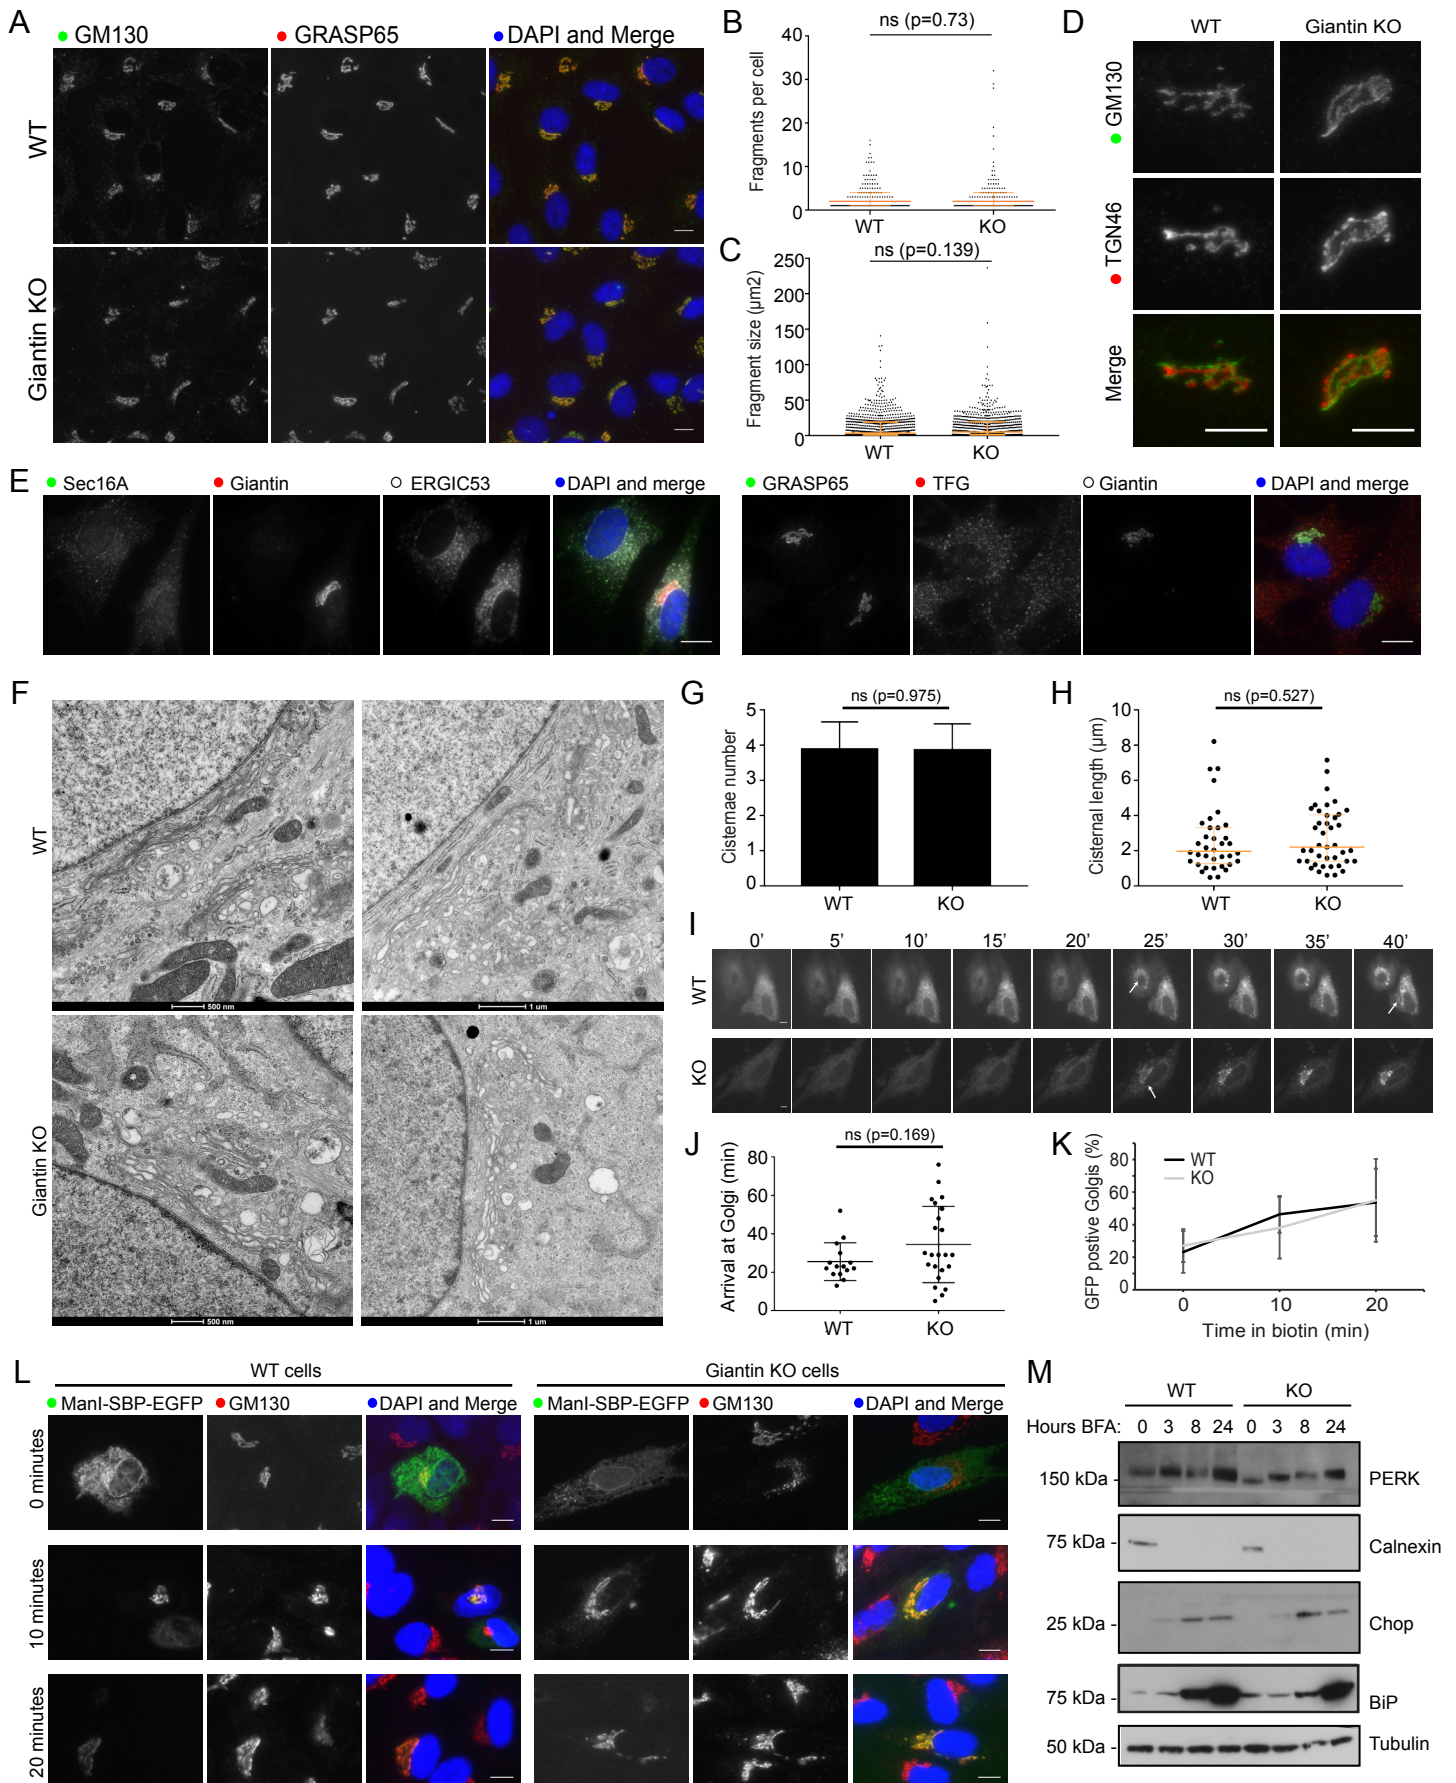

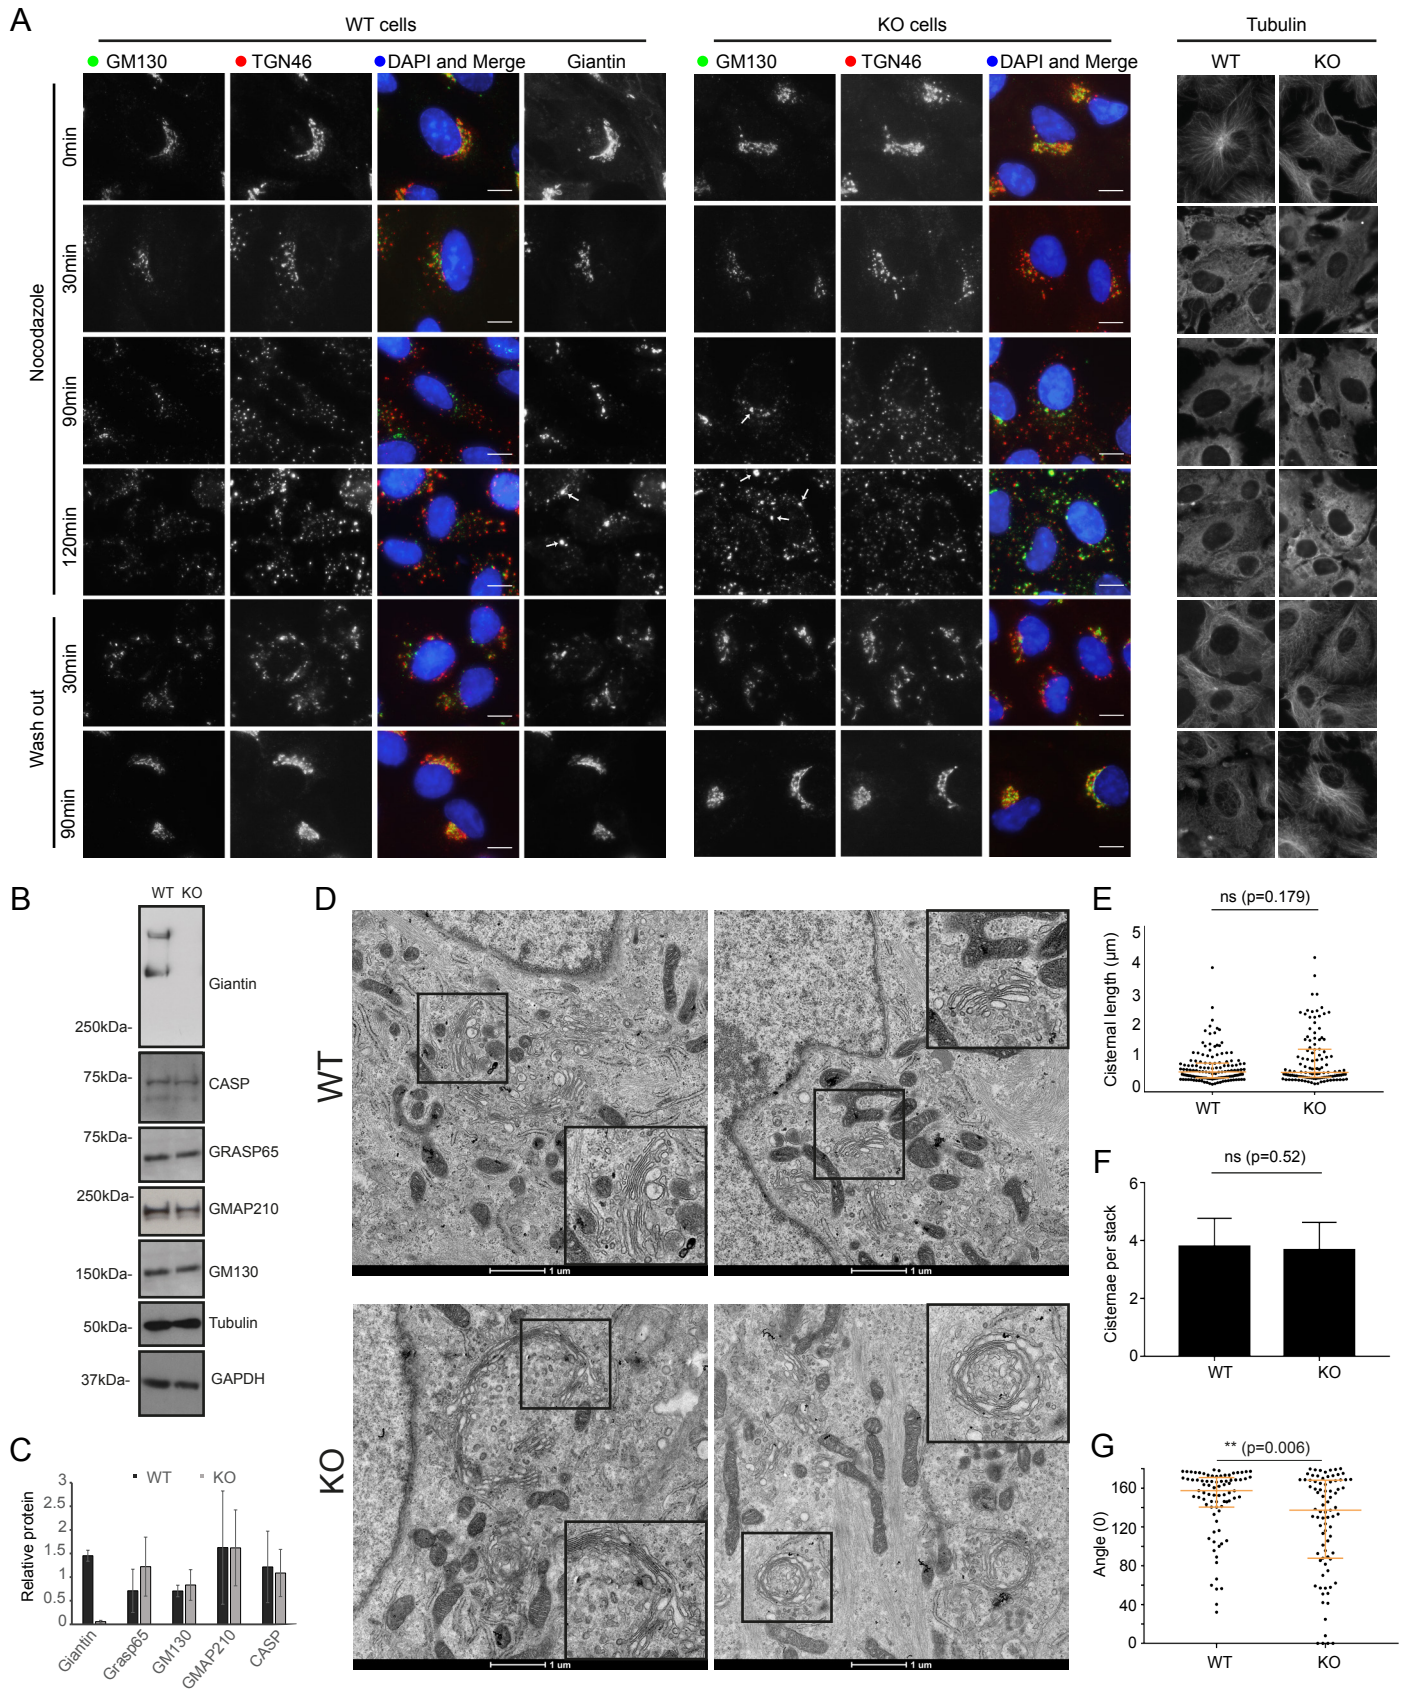

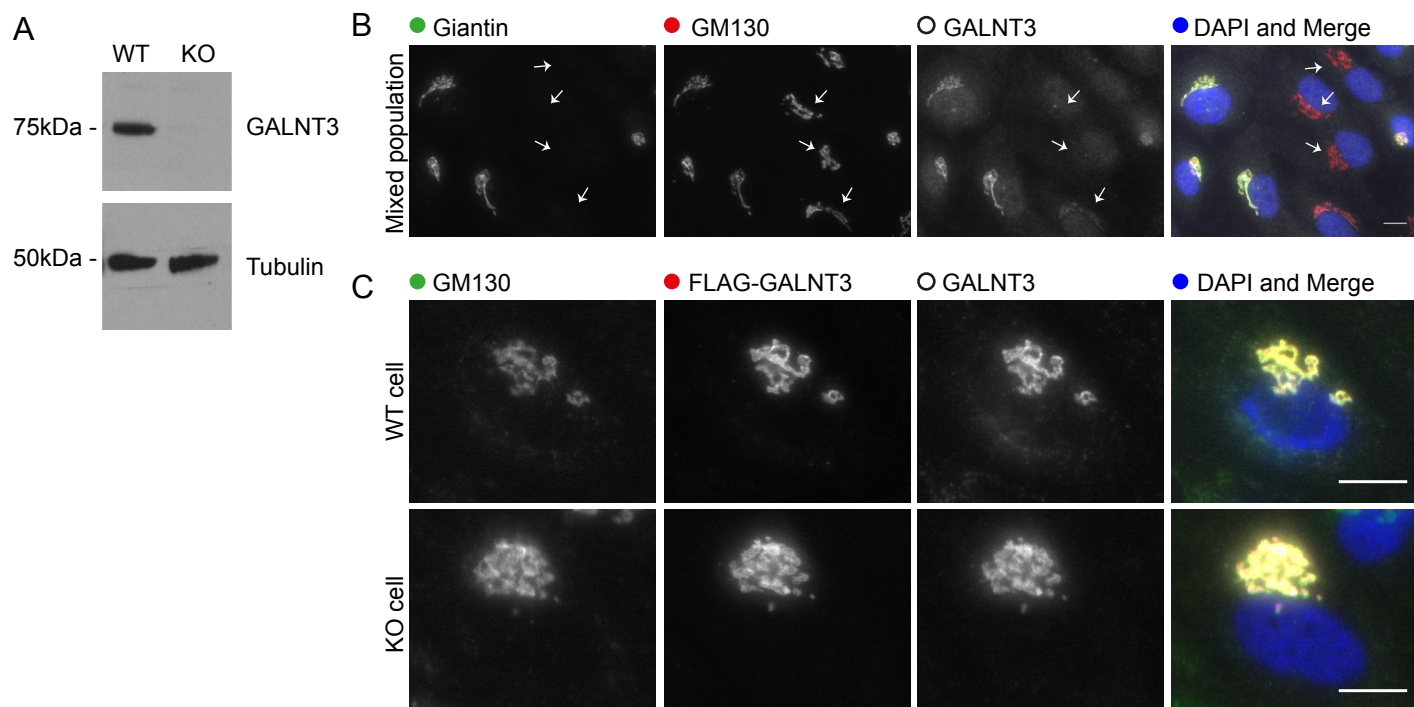

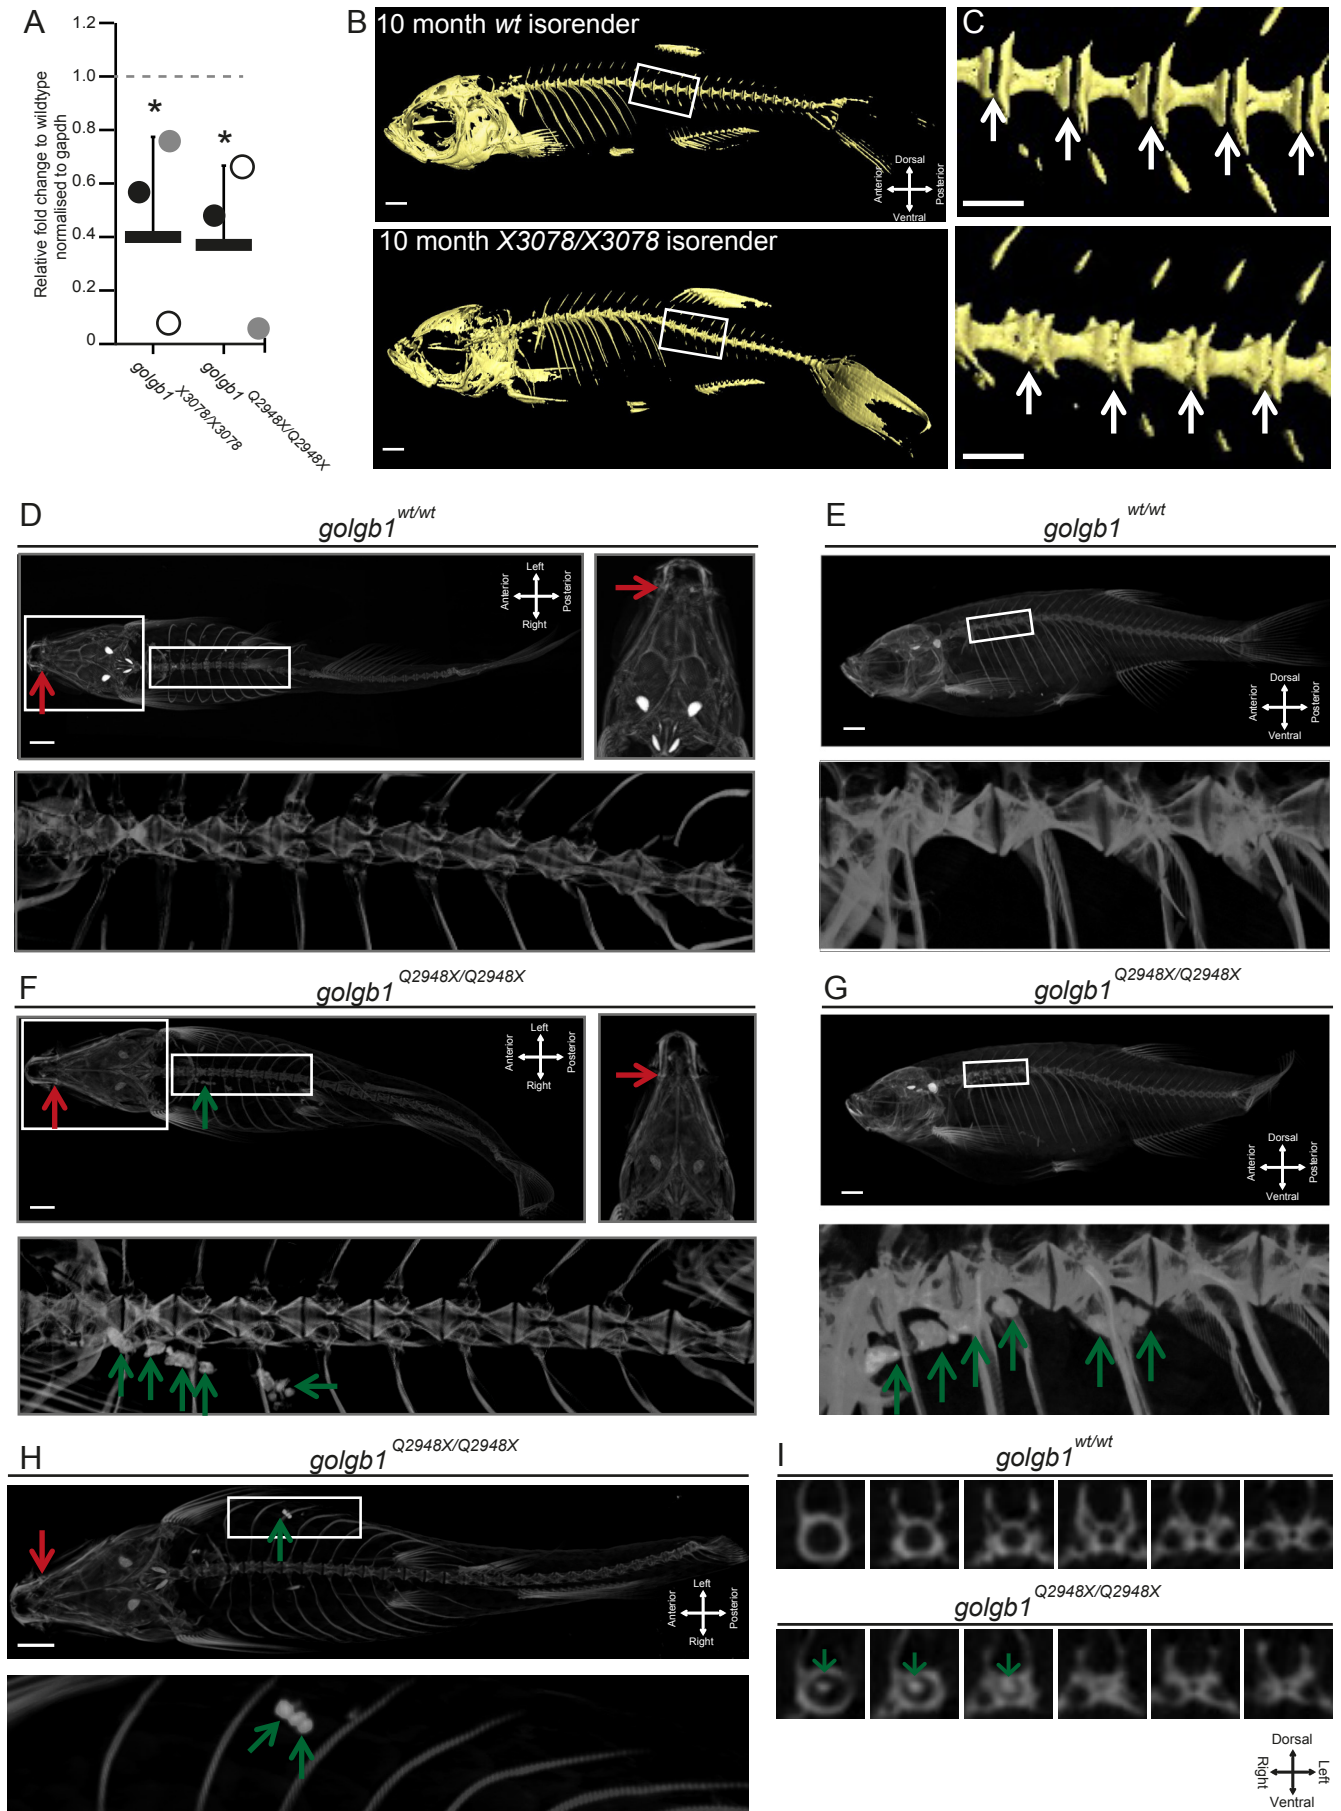

Table 1

| Gene       | WT FPKM   | KO FPKM   | log2 (fold change) | p_value  | q_value  | Pathway                     | Organelle  |
|------------|-----------|-----------|--------------------|----------|----------|-----------------------------|------------|
| GALNT5     | 0.0293487 | 0.693322  | 4.56216            | 5.00E-05 | 0.000214 | N-Glycosylation             | Golgi      |
| ST6GALNAC3 | 0.302522  | 2.43643   | 3.00966            | 5.00E-05 | 0.000214 | O-Glycosylation             | Golgi      |
| EXTL1      | 0.417023  | 1.00605   | 1.2705             | 5.00E-05 | 0.000214 | N-Glycosylation             | Golgi      |
| CSPG5      | 0.351491  | 0.173152  | -1.02145           | 0.0001   | 0.000408 | O-Glycosylation             | Golgi      |
| GAL3ST3    | 0.252928  | 0.123266  | -1.03695           | 0.00015  | 0.000591 | Both N- and O-Glycosylation | Golgi      |
| GALNT1     | 153.498   | 71.0283   | -1.11175           | 5.00E-05 | 0.000214 | O-Glycosylation             | Golgi      |
| DPY19L2P2  | 1.60655   | 0.718415  | -1.16107           | 5.00E-05 | 0.000214 | C-Glycosylation             | Pseudogene |
| ST6GALNAC2 | 0.595085  | 0.24238   | -1.29582           | 5.00E-05 | 0.000214 | N-Glycosylation             | Golgi      |
| MGAT5B     | 6.70667   | 2.5532    | -1.39329           | 5.00E-05 | 0.000214 | N-Glycosylation             | Golgi      |
| GALNT16    | 9.52671   | 3.35166   | -1.5071            | 5.00E-05 | 0.000214 | O-Glycosylation             | Golgi      |
| B4GALNT4   | 9.7297    | 3.34711   | -1.53948           | 5.00E-05 | 0.000214 | O-Glycosylation             | Golgi      |
| B3GNT5     | 1.77188   | 0.581017  | -1.60863           | 5.00E-05 | 0.000214 | O-Glycosylation             | Golgi      |
| A4GALT     | 6.16651   | 1.7832    | -1.78999           | 5.00E-05 | 0.000214 | O-Glycosylation             | Golgi      |
| HS3ST1     | 1.92483   | 0.54196   | -1.82847           | 5.00E-05 | 0.000214 | O-Glycosylation             | Golgi      |
| LFNG       | 2.58988   | 0.653085  | -1.98754           | 5.00E-05 | 0.000214 | Both N- and O-Glycosylation | Golgi      |
| CHST11     | 9.46678   | 1.97911   | -2.25802           | 5.00E-05 | 0.000214 | O-Glycosylation             | Golgi      |
| CHSY3      | 0.8767    | 0.161329  | -2.44208           | 5.00E-05 | 0.000214 | O-Glycosylation             | Golgi      |
| GALNT12    | 1.42884   | 0.199249  | -2.84221           | 5.00E-05 | 0.000214 | O-Glycosylation             | Golgi      |
| GBGT1      | 2.71611   | 0.233266  | -3.54149           | 5.00E-05 | 0.000214 | Glycolipid Glycosylation    | Golgi      |
| FUT4       | 0.904089  | 0.0770361 | -3.55286           | 5.00E-05 | 0.000214 | N-Glycosylation             | Golgi      |
| UGT8       | 4.82991   | 0.272601  | -4.14714           | 5.00E-05 | 0.000214 | Glycolipid Glycosylation    | ER         |
| GALNT3     | 8.35694   | 0.33148   | -4.65598           | 5.00E-05 | 0.000214 | O-Glycosylation             | Golgi      |
| ST6GAL2    | 0.699234  | 0.0208263 | -5.0693            | 5.00E-05 | 0.000214 | N-Glycosylation             | Golgi      |
| ST8SIA4    | 0.341234  | 0         | -                  | 5.00E-05 | 0.000214 | N-Glycosylation             | Golgi      |
